# Supplementary material for: Circ_0000235 targets MCT4 to promote glycolysis and progression of bladder cancer by sponging miR-330-5p
Source: PubMed Central journal article supplement (PMC10397263; doi:10.1038/s41420-023-01582-z), 2023-08-02

**Table S1** SiRNA, miRNA mimics, and inhibitors sequences used in this research.

| SiRNA, mimics and inhibitors    | Sequences                                |
|---------------------------------|------------------------------------------|
| siRNA control                   | TTCTCCGAACGTGTCACGT                      |
| <i>hsa_circ_0000235</i> siRNA-1 | CGUCACCCUGCAUCCUCCATT                    |
| <i>hsa_circ_0000235</i> siRNA-2 | CAUCGUCACCCUGCAUCCUTT                    |
| <i>MCT4</i> siRNA               | TCCTGGGCTTCATTGACATCT                    |
| mimics-NC                       | UCACAACCUCCUAGAAAGAGUAGA                 |
| <i>hsa-miR-326</i> mimics       | Sense(5'-3') CCUCUGGGCCCUUCCUCCAG        |
|                                 | Antisense(5'-3') CUGGAGGAAGGGCCCAGAGG    |
| <i>hsa-miR-330-5p</i> mimics    | Sense(5'-3') UCUCUGGGCCUGUGUCUUAGGC      |
|                                 | Antisense(5'-3') GCCUAAGACACAGGCCCCAGAGA |
| <i>hsa-miR-335</i> mimics       | Sense(5'-3') UCAAGAGCAAUAACGAAAAAUGU     |
|                                 | Antisense(5'-3') ACAUUUUUCGUUAUUGCUCUUGA |
| <i>hsa-miR-502-5p</i> mimics    | Sense(5'-3') AUCCUUGCUAUCUGGGUGCUA       |
|                                 | Antisense(5'-3') UAGCACCCAGAUAGCAAGGAU   |
| <i>hsa-miR-873</i> mimics       | Sense(5'-3') GCAGGAACUUGUGAGUCUCCU       |
|                                 | Antisense(5'-3') AGGAGACUCACAAGUCCUGC    |
| <i>hsa-miR-330-5p</i> inhibitor | GCCUAAGACACAGGCCCCAGAGA                  |

**Table S2** Primers for qRT-PCR.

| <b>Gene Symbol</b>              | <b>Forward Primer</b>   | <b>Reverse Primer</b>   |
|---------------------------------|-------------------------|-------------------------|
| <i>hsa_circ_0000235</i>         | TCGAAATCCGAAGTGCCACC    | GGAGGATGCAGGGTGACG      |
| <i>MCT4</i>                     | ACTCCGTCTACCTCTTCAGC    | ATGGCACTGGAGAACTTGTG    |
| <i>GAPDH</i>                    | GGAGCGAGATCCCTCCAAAAT   | GGCTGTTGTCATACTTCTCATGG |
| <i>CBLL1</i>                    | TGTGCAGCGAATTGAGCAGT    | GCACGGGTAACAGGTTTTCCA   |
| <i>CTDSP1</i>                   | AGACCCAGTCCAATACCTG     | GACGCTTCAACACGTAGACCT   |
| <i>TOMM40</i>                   | TCGGGGAGTCCAAC TACCAC   | TGAGCGTTGAGACTGCCAC     |
| <i>ENG</i>                      | GGCCAGCATTGTCTCACTTC    | CGGCACACTTTGTCTGGATC    |
| <i>HARS2</i>                    | TCCCTCCGCTATGACCTTACT   | GCCACACCTTTCCAACATGAT   |
| <i>LITAF</i>                    | ATGTCGGTTCCAGGACCTTAC   | TACGAAGGAGGATTCATGCCC   |
| <i>PAK4</i>                     | GGACATCAAGAGCGACTCGAT   | CGACCAGCGACTTCCTTCG     |
| <i>NOP2</i>                     | CCCAGTCCCTATTTAATGCTCCT | CGTGGTTCACCATACCATCTTCT |
| <i>PRR11</i>                    | AAAGATGGACCCATGCAGATAAC | TGCTTTCGGCGATGGTATAAG   |
| <i>RAPGEF3</i>                  | GACCGGAAGTACCACCTTAGG   | AGATTCCCACAACCTTGGCTCC  |
| <i>SF3B4</i>                    | GGAAGATGCTGACTATGCCATT  | TGTTGTGAGCTGATGCTTTGTT  |
| <i>SLC37A4</i>                  | CTCCACAGTACCTGTCTTTGC   | ACCCACAGGTAAGGGGACAG    |
| <i>ENO1</i>                     | GCCGTGAACGAGAAGTCTTG    | ACGCCTGAAGAGACTCGGT     |
| <i>G6PD</i>                     | AACATCGCCTGCGTTATCCTC   | ACGTCCCGGATGATCCCAA     |
| <i>CPNE1</i>                    | CACTGCGTGACCTTGGTTCA    | CTCCCACATCCTGTAAAAGGAC  |
| <i>FAM129B</i>                  | CTGACGGAGTTCCTCCAGTTC   | GAGGTTCCCCGAGAAGACGAT   |
| <i>G6PC3</i>                    | CGAGGCGCTACAGAACCAG     | CACTCGGTGATGAGGCTGAT    |
| <i>GRINA</i>                    | CTCACCCCAGCATGGAAACTA   | CAAGGTCAGCACTAGGAACAC   |
| <i>SNRPA</i>                    | CTTTCTGAGAATCCACCGAATCA | CCAGACGGACCTCCTTGAAG    |
| <i><math>\beta</math>-actin</i> | AATCTGGCACCACACCTTCTAC  | ATAGCACAGCCTGGATAGCAAC  |
| <i>CCNY</i>                     | TAGCACAGTCAGTCAACCAAAC  | TGGTGGCACTTCGGATTTTCG   |
| <i>U6</i>                       | CGCTTCGGCAGCACATATACTA  | TCACGAATTTGCGTGTCATCCT  |
| <i>ALDOA</i>                    | ATGCCCTACCAATATCCAGCA   | GCTCCAGTGGACTCATCTG     |

**Table S3** Specific upstream primers for miRNAs used in qPCR assays.

| <b>miRNA</b>          | <b>Sequences</b>        |
|-----------------------|-------------------------|
| <i>hsa-miR-326</i>    | CTCTGGGCCCTTCCTCCAG     |
| <i>hsa-miR-330-5p</i> | TCTCTGGGCCTGTGTCTTAG    |
| <i>hsa-miR-335</i>    | TCAAGAGCAATAACGAAAAATGT |
| <i>hsa-miR-502-5p</i> | ATCCTTGCTATCTGGGTGCTA   |
| <i>hsa-miR-873</i>    | GTGCAGGAACTTGTGAGTCT    |

**Table S4** Sequences of the FISH and pulldown probes used in this study.

| <b>Gene name</b>                   | <b>Probe (5'-3')</b>                    |
|------------------------------------|-----------------------------------------|
| <i>hsa_circ_0000235</i>            | 5'CY3 - TTTGTCCTGGAGGATGCAGGGTGACGATGGC |
| <i>hsa-miR-330-5p</i>              | 5'CY5 - GCCTAAGACACAGGCCAGAGA           |
| <i>hsa-miR-330-5p</i> pulldown     | UCUCUGGGCCUGUGUCUUAGGC - 3'Biotin       |
| <i>hsa-miR-330-5p</i> mut pulldown | UGCCUGUGUCUUAGGC - 3'Biotin             |



**Table S5** Predicted miRNA-circ235 interaction by Circinteractome.

| Circ-MiRNA Prediction             |                                           |           |                  |                |            |             |          |        |        |                   |                                 |
|-----------------------------------|-------------------------------------------|-----------|------------------|----------------|------------|-------------|----------|--------|--------|-------------------|---------------------------------|
| Circ-Mirbase ID                   | CircRNA (Top) - miRNA (Bottom)<br>Pairing | Site Type | CircRNA<br>Start | CircRNA<br>End | 3' pairing | local<br>AU | position | TA     | SPS    | context+<br>score | context+<br>score<br>percentile |
| hsa_circ_0000235 (5' ... 3')      | AGCUGACGGCUGAAUGUGCCAUC<br>               | 7mer-m8   | 299              | 305            | 0.003      | 0.019       | -0.06    | -0.007 | -0.036 | -0.201            | 94                              |
| <b>hsa-miR-183 (3' ... 5')</b>    | UCACUUAAGAUGGUCACGGUAU                    |           |                  |                |            |             |          |        |        |                   |                                 |
| hsa_circ_0000235 (5' ... 3')      | UUAUGACAAACACAACCCAGAGC<br>               |           |                  |                |            |             |          |        |        |                   |                                 |
| <b>hsa-miR-326 (3' ... 5')</b>    | GACCUCCUCCCCGGGUCUCC                      | 7mer-m8   | 231              | 237            | 0.012      | -0.027      | -0.051   | 0.026  | -0.066 | -0.226            | 94                              |
| hsa_circ_0000235 (5' ... 3')      | UUAUGACAAACACAA-CCCAGAGC<br>              |           |                  |                |            |             |          |        |        |                   |                                 |
| <b>hsa-miR-330-5p (3' ... 5')</b> | CGGAUUCUGUGUCCGGGUCUCU                    |           |                  |                |            |             |          |        |        |                   |                                 |
| hsa_circ_0000235 (5' ... 3')      | ACAAUAAAUGUGUCGCUCUUGC<br>                | 7mer-m8   | 106              | 112            | 0.003      | -0.032      | -0.047   | 0.005  | -0.018 | -0.209            | 96                              |
| <b>hsa-miR-335 (3' ... 5')</b>    | UGUAAAAAGCAAUAACGAGAACU                   |           |                  |                |            |             |          |        |        |                   |                                 |
| hsa_circ_0000235 (5' ... 3')      | CCUCCAGGACAAAUAGCAAGGAA<br>               |           |                  |                |            |             |          |        |        |                   |                                 |
| <b>hsa-miR-502-5p (3' ... 5')</b> | AUCGUGGGUCUAUCGUUCCUA                     | 8mer-1a   | 19               | 26             | 0.003      | -0.054      | -0.109   | 0.01   | -0.063 | -0.46             | 99                              |
| hsa_circ_0000235 (5' ... 3')      | CAACCAAACCUCAAGUAUACAAU<br>               |           |                  |                |            |             |          |        |        |                   |                                 |
| <b>hsa-miR-568 (3' ... 5')</b>    | CACACAU AUGUAAAUAUGUA                     |           |                  |                |            |             |          |        |        |                   |                                 |
| hsa_circ_0000235 (5' ... 3')      | GAUGAAAUCUUCACCCUCUUUC<br>                | 7mer-m8   | 187              | 193            | 0.012      | 0.015       | -0.044   | 0.022  | 0.021  | -0.094            | 93                              |
|                                   |                                           |           |                  |                |            |             |          |        |        |                   |                                 |
|                                   |                                           |           |                  |                |            |             |          |        |        |                   |                                 |

|                                   |                         |         |     |     |       |        |        |       |        |        |    |  |
|-----------------------------------|-------------------------|---------|-----|-----|-------|--------|--------|-------|--------|--------|----|--|
| <b>hsa-miR-583 (3' ... 5')</b>    | CAUUACCCUGGAAGGAGAAAC   |         |     |     |       |        |        |       |        |        |    |  |
| hsa_circ_0000235 (5' ... 3')      | AUAGCACAGUCAGUCAACCAAAC |         |     |     |       |        |        |       |        |        |    |  |
|                                   |                         | 7mer-1a | 74  | 80  | 0.004 | 0.01   | -0.042 | 0.008 | 0.027  | -0.067 | 85 |  |
| <b>hsa-miR-659 (3' ... 5')</b>    | ACCCUGGGAGGGACUUGGUUC   |         |     |     |       |        |        |       |        |        |    |  |
| hsa_circ_0000235 (5' ... 3')      | GACAAACACAACCCAGAGCAGAA |         |     |     |       |        |        |       |        |        |    |  |
|                                   |                         | 7mer-1a | 235 | 241 | 0.001 | 0.026  | -0.042 | 0.011 | -0.052 | -0.13  | 82 |  |
| <b>hsa-miR-767-3p (3' ... 5')</b> | UCUUUGGUACCCCAUACUCGUCU |         |     |     |       |        |        |       |        |        |    |  |
| hsa_circ_0000235 (5' ... 3')      | UAGCAAGGAAAUACAGUCCUGC  |         |     |     |       |        |        |       |        |        |    |  |
|                                   |                         | 7mer-m8 | 32  | 38  | 0.012 | -0.021 | -0.057 | 0.02  | -0.018 | -0.184 | 95 |  |
| <b>hsa-miR-873 (3' ... 5')</b>    | UCCUCUGAGUGUUCAAGGACG   |         |     |     |       |        |        |       |        |        |    |  |

MiRNAs with potential interactions with has\_circ\_0000235 were predicted using the Circinteractome tool. Only miRNAs with scores higher than 90 were considered for further confirmation in the subsequent step.

A

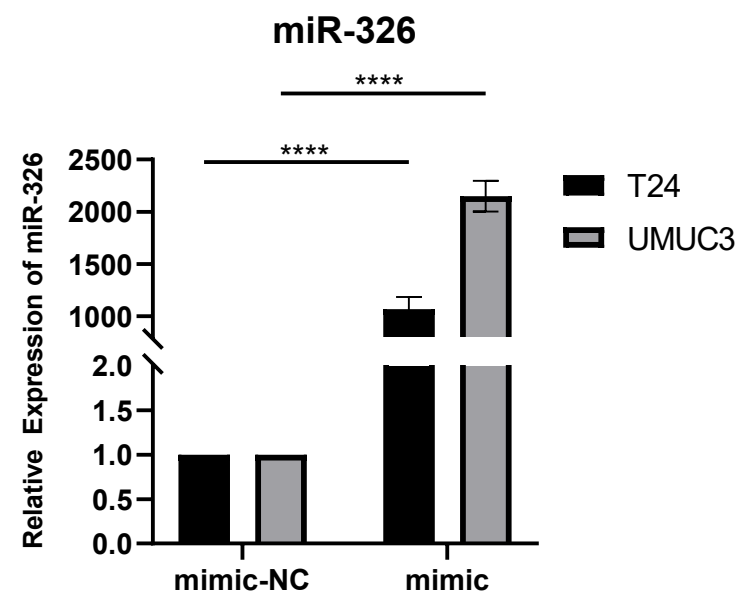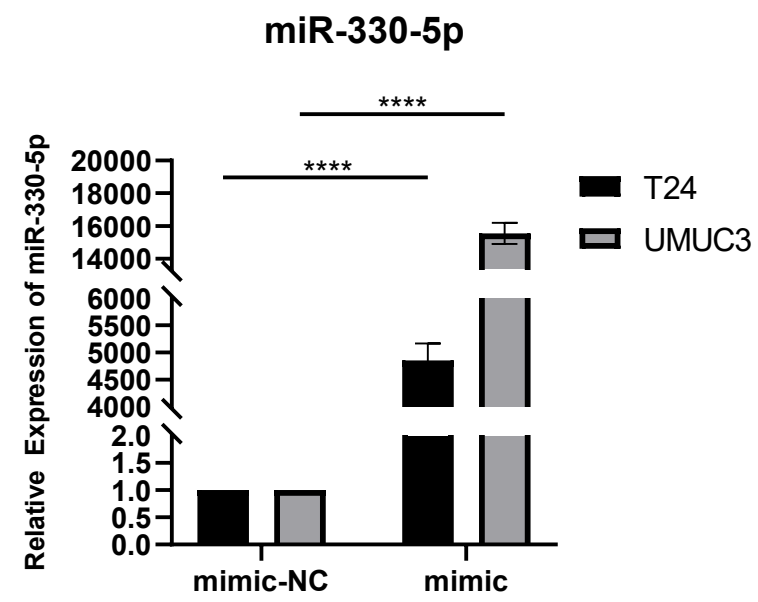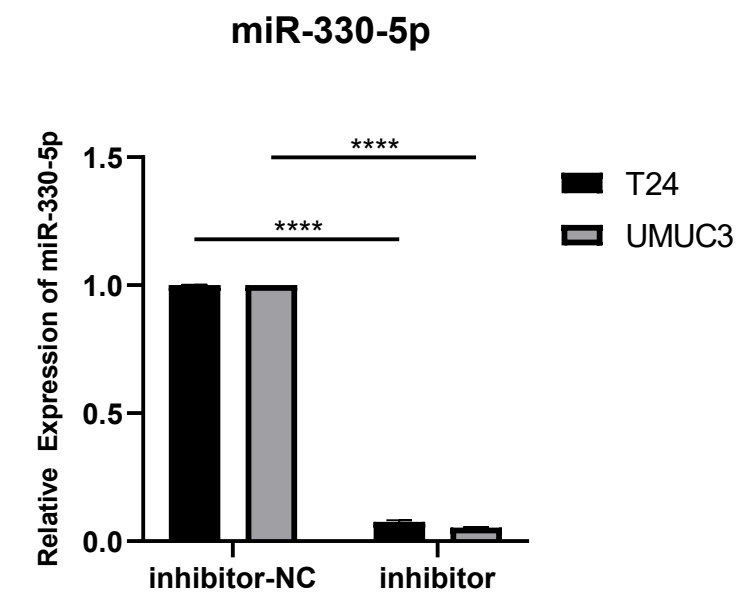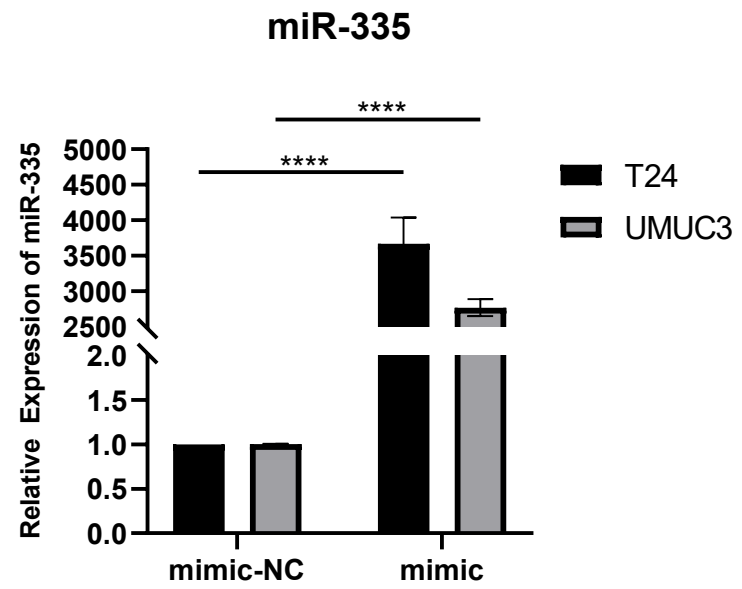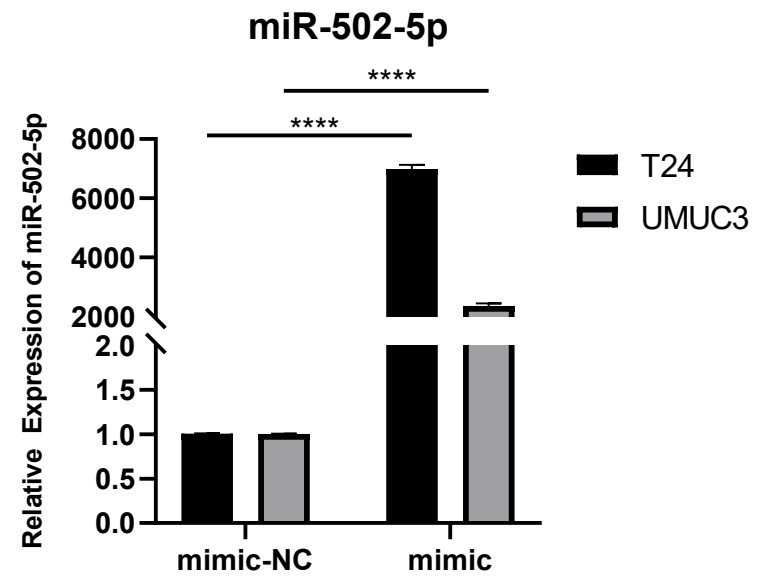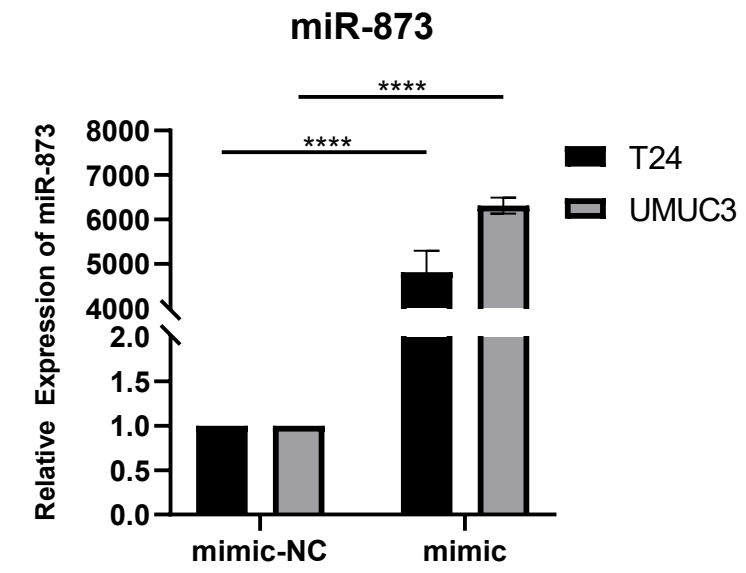

B

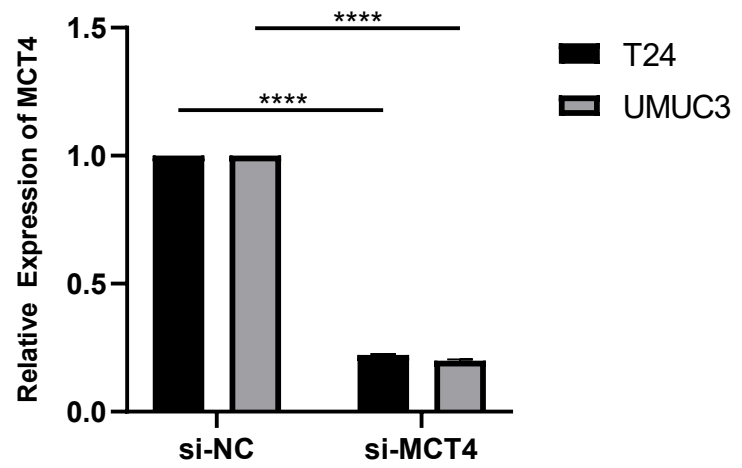

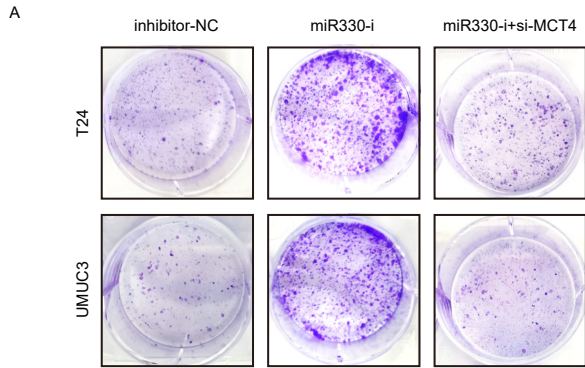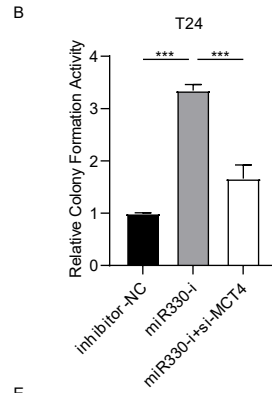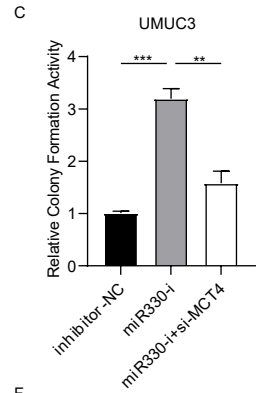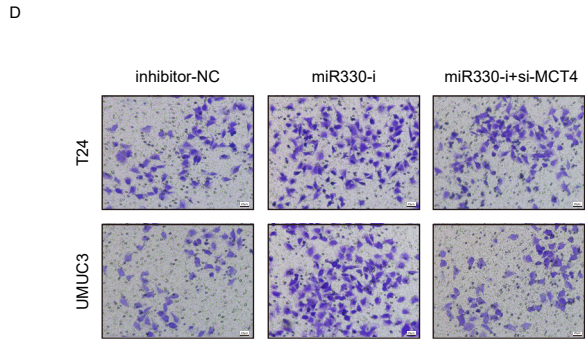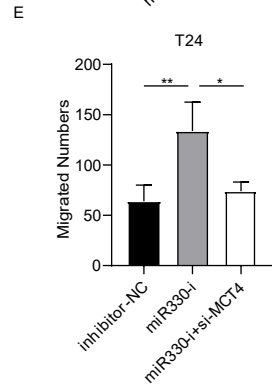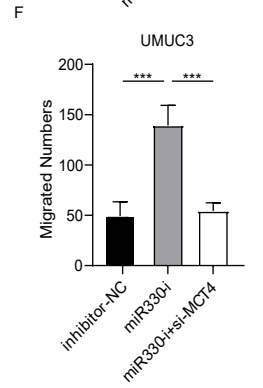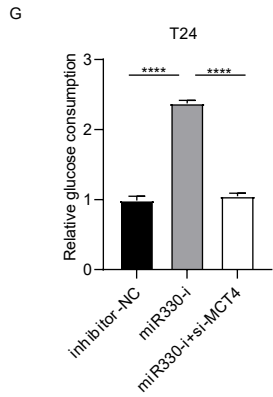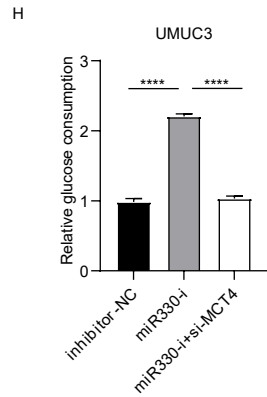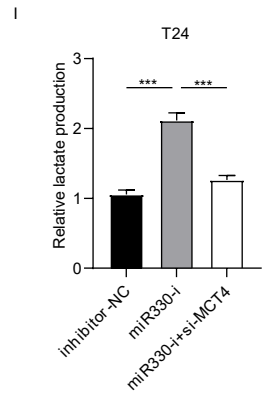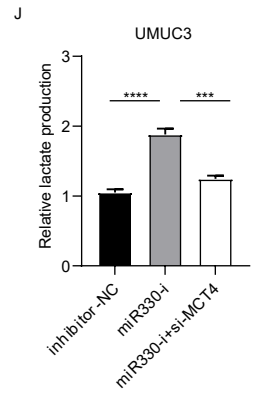

circ235

vector

circ235+sh-MCT4

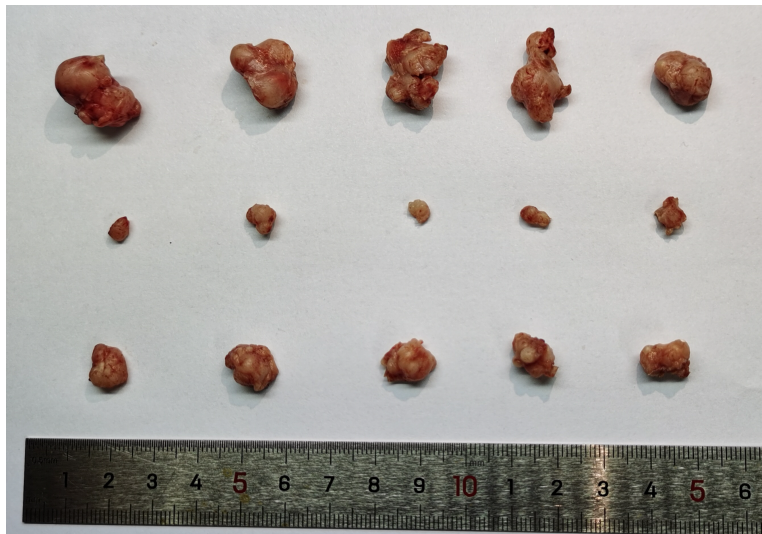

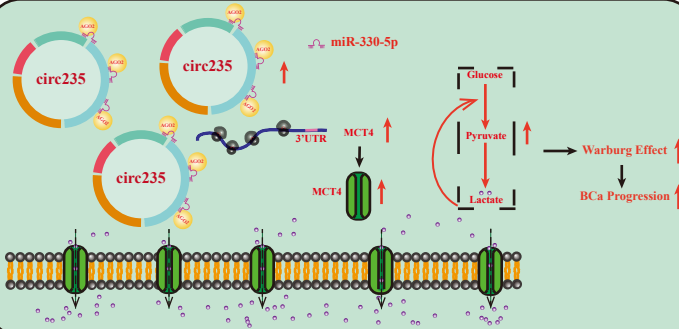

Supplement: 41420_2023_1582_MOESM1_ESM.pdf [file 41420_2023_1582_MOESM1_ESM.pdf]
