# Supplementary material for: Circ_0000235 targets MCT4 to promote glycolysis and progression of bladder cancer by sponging miR-330-5p
Source: PubMed Central journal article supplement (PMC10397263; doi:10.1038/s41420-023-01582-z), 2023-08-02

Fig.5 H-I

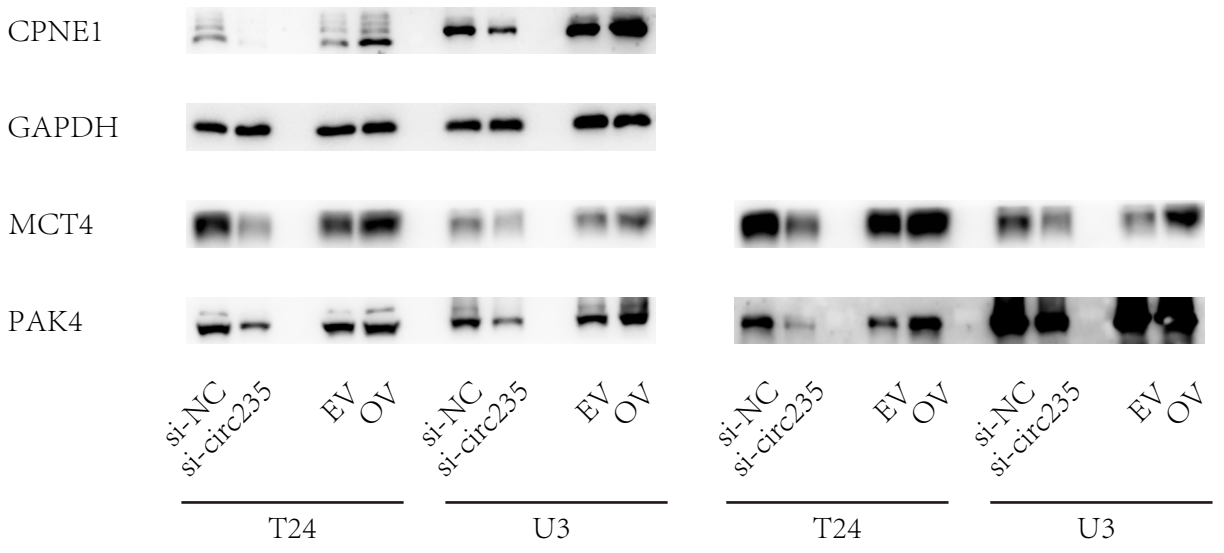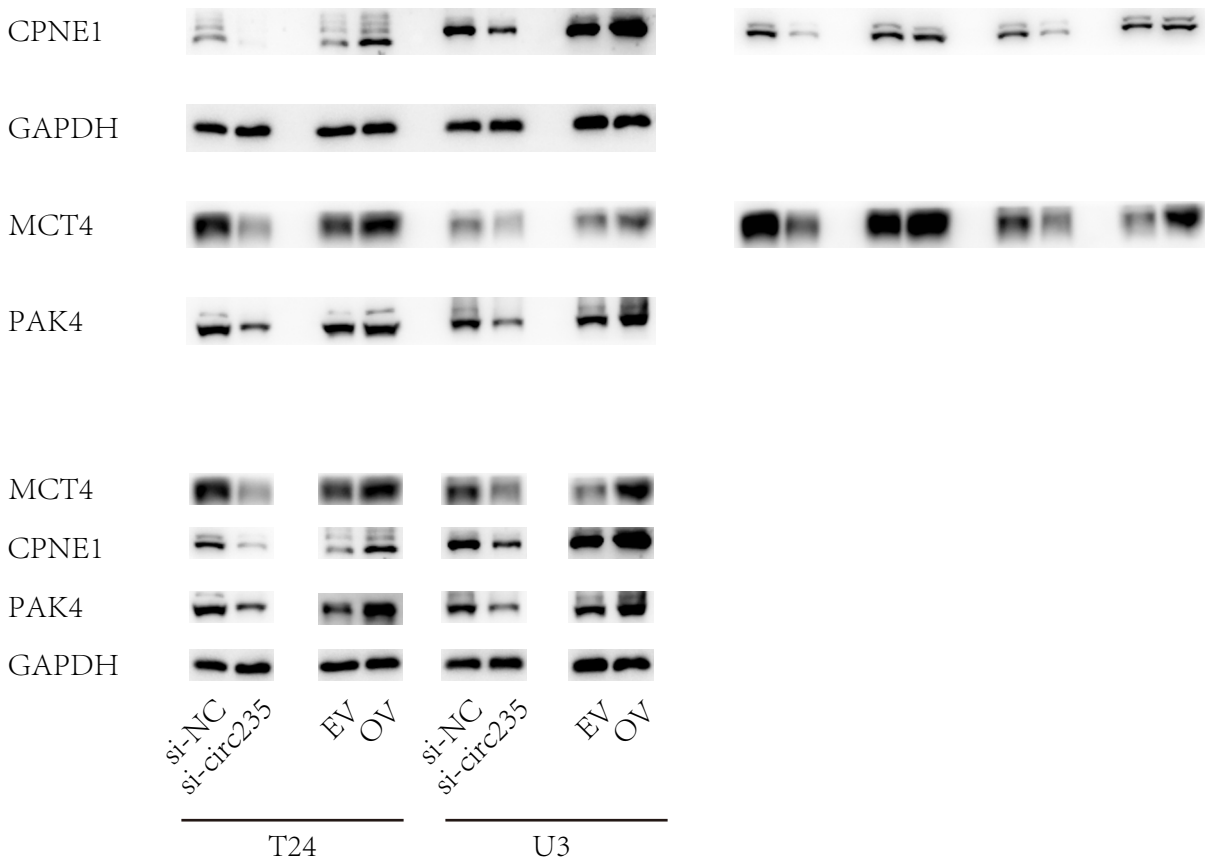

Fig.6 M-N

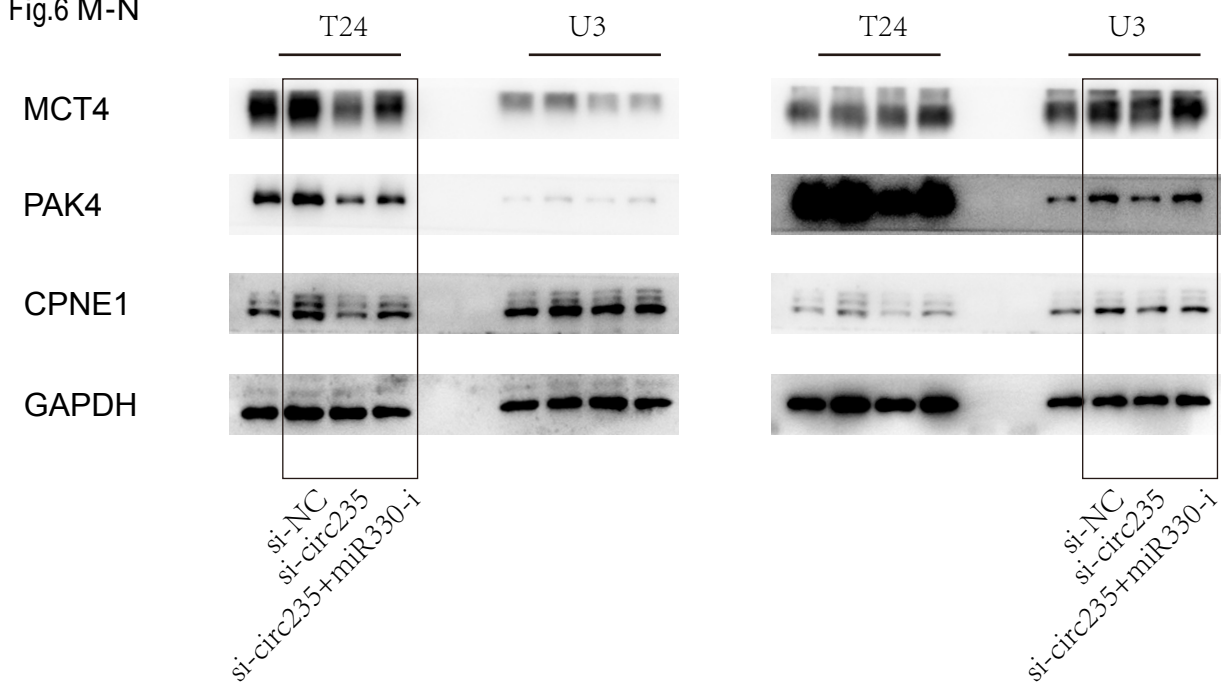

Fig.5M

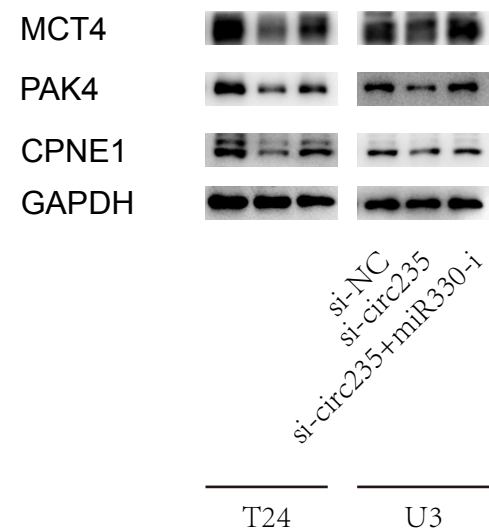

MCT4  
PAK4  
CPNE1  
GAPDH

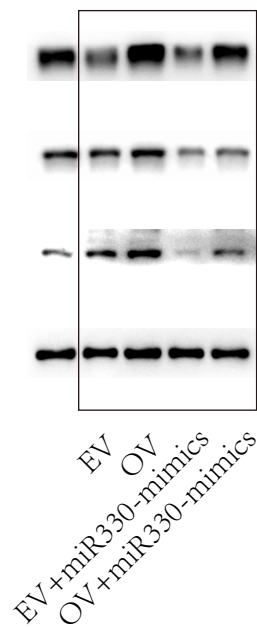

Fig.5N

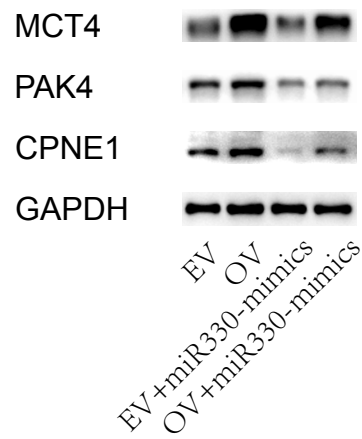

Supplement: 41420_2023_1582_MOESM2_ESM.pdf [file 41420_2023_1582_MOESM2_ESM.pdf]
